1 **Visual processing and collective motion-related decision-making in desert locusts**

2 Itay Bleichman<sup>1</sup>, Pratibha Yadav<sup>1,2</sup> and Amir Ayali<sup>1,2\*</sup>

3 <sup>1</sup> *School of Zoology, Tel Aviv University, Israel*

4 <sup>2</sup> *Sagol School of Neuroscience, Tel Aviv University, Israel*

5

6 \*Author for correspondence

7

8 **Abstract**

9 Collectively moving groups of animals rely on the decision-making of locally interacting  
10 individuals in order to maintain swarm cohesion. However, the complex and noisy visual  
11 environment poses a major challenge to the extraction and processing of relevant  
12 information. We addressed this challenge by studying swarming-related decision-making  
13 in desert locust last-instar nymphs. Controlled visual stimuli, in the form of random dot  
14 kinematograms, were presented to tethered locust nymphs in a trackball setup, while  
15 monitoring movement trajectory and walking parameters. In a complementary set of  
16 experiments, the neurophysiological basis of the observed behavioral responses was  
17 explored. Our results suggest that locusts utilize filtering and discrimination upon  
18 encountering multiple stimuli simultaneously. Specifically, we show that locusts are  
19 sensitive to differences in speed at the individual conspecific level, and to movement  
20 coherence at the group level, and may use these to filter out non-relevant stimuli. The  
21 locusts also discriminate and assign different weights to different stimuli, with an observed  
22 interactive effect of stimulus size, relative abundance, and motion direction. Our findings  
23 provide insights into the cognitive abilities of locusts in the domain of decision-making  
24 and visual-based collective motion, and support locusts as a model for investigating  
25 sensory-motor integration and motion-related decision-making in the intricate swarm  
26 environment.

27

28

29 **Keywords:** *Schistocerca gregaria*, cognition, discrimination, visual processing, swarming

30

31

32

### 33 **Introduction**

34

35 A fundamental aspect of all instances of collective motion is that of individual repeated  
36 decision-making [1–3]. This, in turn, is both driven by and relies on local interactions  
37 among the constituent agents, requiring each agent to obtain information about its  
38 surrounding social environment [4]. The consequent formation and maintenance of this  
39 distinctive form of synchronized movement is understood to be beneficial to the  
40 participating individuals [5–7].

41 A quintessential example of the above process is displayed by the desert locust,  
42 *Schistocerca gregaria* (Acrididae). When in the gregarious phase, they collectively move  
43 in huge dense marching swarms ([8][9], figure 1A). Locust swarming is commonly  
44 accepted as heavily relying on visual perception [10]: each individual locust, with limited  
45 visibility amidst an unpredictable terrain, and an intricate, continuously changing social  
46 environment, must engage in repeated and dynamic decision-making to avoid getting  
47 derailed, while at the same time sustaining the collective motion. This can be translated  
48 into a two-layer process: the continuous extraction of the (unknown) state of the social  
49 surroundings from the input received by the sensory system (i.e. the eyes); and sensory-  
50 motor integration to facilitate the appropriate motor response. Different approaches,  
51 ranging from mathematical modeling to studying synchronization in small groups of  
52 locusts in laboratory settings, have been employed in the study of swarming behavior in  
53 the desert locust [11–14]. However, our understanding of swarm formation and

54 maintenance is still far from complete, partly due to a lack of answers to some fundamental  
55 questions regarding decision-making at the individual level.

56 The swift extraction and processing of relevant information from a changing, complex  
57 sensory environment presents a critical challenge [15], especially in the noisy and cluttered  
58 visual surroundings of a locust swarm. Insects may adopt a range of strategies to increase  
59 the efficiency of information perception and processing by reducing the information load  
60 [16]. Such strategies include filtering relevant stimuli [17], categorizing the targets [18],  
61 and generalizing visual patterns [19]. Filtering relevant visual stimuli, for example by  
62 employing a “matched filter” in the visual modality, can reduce the amount of information  
63 that needs to be processed [16,20]. In dragonflies and hoverflies, for example, small target  
64 detectors are specifically tuned to objects that constitute only a 1–3° angle of the visual  
65 field [21,22]. The filtering may occur at different levels of stimuli processing and vary with  
66 the ecological relevance of the stimuli. The insect's nervous system can then channel its  
67 resources into performing essential computations, even if complex, in order to extract the  
68 task-relevant visual information at low energetic cost [23]. In the case of the desert locust,  
69 we hypothesize that, during collective-motion-related visual processing, the locust  
70 identifies and extracts relevant stimuli – swarming-related visual cues – from the overall  
71 visual scenery, based on a subset of visual features, enabling swift and appropriate  
72 decision-making. It is possible that a matched filter for walking speed is used to recognize  
73 marching conspecifics; while filtering based on the coherence of the moving group, as  
74 inferred from a subset of the swarm, might be used to estimate the overall direction of the  
75 swarm.

76 An additional difficulty imposed on information gathering can arise from the presence of  
77 multiple relevant competing inputs [24–26]. In this case, reducing the information load can  
78 also be achieved through selective attention – the ability to focus on one type of preferred  
79 stimulus while ignoring other perceivable ones [16,27]. Although selective attention  
80 remains arguable in the context of insects, the much related key capability to discriminate  
81 among different stimuli based on shape, color, and pattern orientation has been observed  
82 in honey bees and bumblebees [28–31]; as well as in fruit flies, which show anticipatory  
83 behavior consistent with selective attention to the tracked visual stimulus [32,33].

84 Desert locusts exhibit a characteristic pause-and-go motion, with pause duration correlated  
85 with a high probability of turning to change direction [34]. We can thus refer to the locust  
86 collective motion as comprising a series of repeated decisions taken by the individuals in  
87 the group [13]. Additionally, the decision-making process itself can be considered as a  
88 problem of vector selection, including a choice between continued standing or initiating  
89 walking, and a choice of direction. Observed variations in the fraction of time spent  
90 walking, and particularly in pause duration and the subsequent change in direction, in  
91 response to different visual stimuli, can thus offer valuable insights into the locust decision-  
92 making process.

93 We have previously shown that a specific motion-sensitive descending interneuron (one of  
94 many behaviorally-relevant descending interneurons (DINs, e.g. [35]), the descending  
95 contralateral movement detector (DCMD), conveys information relevant to the locust  
96 response to small, slow moving objects (such as other marching locusts [13] and see also  
97 [36], [37]). Furthermore, this pathway was shown to demonstrate density-dependent phase-  
98 related differences [13], [38], manifested in gregarious locusts being better suited than

99 solitary ones to the repeated decision-making, and thereby facilitating and coordinating  
100 the marching behavior of the swarm. Monitoring the DCMD response to various swarming-  
101 related visual stimuli may offer some insights into the neural mechanisms behind the  
102 decision-making process under focus in this study.

103 Here we explored swarming-related decision-making at the behavioral level in *S. gregaria*  
104 nymphs, by analyzing different aspects of the individual locust's walking behavior. These  
105 served in our investigation of the role of visual feature recognition and discrimination as  
106 possible underlying mechanisms in decision-making. A complementary preliminary  
107 electrophysiological study of the processing of visual-motion inputs, relevant to the  
108 dynamic interactions between the individuals in a marching swarm, has lent further support  
109 to our hypotheses.

110

## 111 **Methods:**

112 **Animals:** All experiments were carried out using V<sup>th</sup>-instar larvae of *S. gregaria*, taken  
113 from our high-density, gregarious phase locust lab-colony at the School of Zoology, Tel  
114 Aviv University (rearing conditions were as recently described in [12]).

115 **The experimental setup:** Individual locusts were tethered in a fixed (forward) head  
116 direction, via a 1 cm long clear vinyl tube attached to their pronotum with epoxy resin, in  
117 a natural-like typical walking posture, above an airflow-suspended Styrofoam trackball,  
118 illuminated from above with LED lights. The ball was decorated with an irregular black  
119 over white pattern in order to facilitate the tracking of its movement. Two parallel LCD  
120 screens, 30 cm apart, were positioned one on either side of the locust, allowing the

121 presentation of controlled visual stimuli, while carefully monitoring the locust's behavioral  
122 responses and movements of the ball by a high-speed video camera (figure 1B).  
123 Experiments started after one hour of acclimation of the locust to the tether. In two sets of  
124 behavioral experiments the locusts' responses were monitored using FicTrac [39], a  
125 computer-vision tracking software that determines the angular position of the ball for each  
126 frame. In an additional set of experiments, an optical mouse sensor was further utilized to  
127 record the movement of the ball. The behavioral setup was complemented by a  
128 corresponding electrophysiological setup, enabling the recording of the neural responses  
129 of the locust DCMD interneurons to (similar) controlled visual stimuli (see  
130 Electrophysiology section below).

131 ***The visual stimuli:*** Visual stimuli, designed using the Python programming language and  
132 PsychoPy (an open source software package; [40]), were presented in the form of random  
133 dot kinematograms (RDK) of black dots on a white background, at a maximum contrast of  
134 100%. We chose RDK following previous reports of utilizing such stimuli for testing  
135 multiple target processing, and specifically motion perception [41]. Unless stated  
136 otherwise, the RDK comprised 40, 1.2 cm diameter dots, corresponding to a subtended  
137 visual angle of  $6.86^\circ$  on the insect's eye (within the known size of the locusts). Each visual  
138 stimulus was presented for 60 seconds.

139 We first presented the control stimuli: (1) blank (white screen), and (2) still dots on a white  
140 screen. Next, we conducted a set of different behavioral experiments to investigate the  
141 tethered locust's response to the following different tentative features of swarming-related  
142 visual stimuli:

143 *Direction of motion* – The RDK comprised fully coherent, 5 cm/s moving dots, simulating  
144 a coherently moving locust swarm. Three types of stimuli were used, each with a different  
145 direction of motion: (1) both screens showing dots aligned with the direction of the tethered  
146 locust's heading; (2) both screens showing dots in a direction 180° to the tethered locust's  
147 heading; and (3) one screen showing aligned dots and the other with dots moving in the  
148 opposite direction.

149 *Motion speed* - Tethered locusts were presented with dots moving with 100% coherence  
150 on both screens, aligned with the tethered locust's heading, and at graded speeds. The tested  
151 motion speeds were 1, 3, 5, 10 and 15 cm/s, which cover a marching locust's speed range,  
152 as measured previously [12].

153 *Coherence level* - Tethered locusts were presented with dots moving on both screens at a  
154 motion speed of 5 cm/s and graded coherence levels: a fraction of the dots moved in  
155 alignment with the locust's heading while the remaining dots each moved in a random  
156 direction. Coherence levels tested were 0 (all dots moving in different random directions),  
157 0.1, 0.25, 0.5, and 1 (all dots aligned with the locust's heading direction).

158 *Competing stimuli* - A fourth experiment was conducted to investigate situations of  
159 competing stimuli, i.e., decision-making in the presence of conflict. First, a more  
160 quantitative type of conflict was presented to the locusts: 2/3 of the dots on each screen  
161 moved in one direction, either aligned with or opposite to the tethered locust's heading,  
162 while the remaining 1/3 moved in the other direction. Next, a size difference was added  
163 (size mimicking proximity differences): the 1/3 dots moving in the opposite direction to  
164 the 2/3 were also double the size of the latter (2.4 cm diameter).

165 **Behavioral analysis:** The rotation angle, the difference between two angular positions of  
166 the trackball in subsequent frames, was used to analyze the locust motion parameters. A  
167 motion threshold was determined based on the extent of the rotation angle. A locust was  
168 considered to be moving if the threshold was crossed for at least 10 consecutive frames.  
169 Pausing was determined if the same threshold was not crossed for at least 20 consecutive  
170 frames. Based on these indices, we calculated the fraction of time spent walking (walking  
171 fraction) and the average pause duration. A sideways motion (positive and negative)  
172 threshold was determined based on the direction of the trackball rotation. A locust was  
173 considered to be moving sideways if this threshold was crossed for at least 10 consecutive  
174 frames. The coordinate positions from the optical mouse sensor were used to determine the  
175 walking parameters by calculating the walking distance, using the Cartesian formula.

176 **Electrophysiology:** Dissection and electrophysiological procedures followed Ariel et al.,  
177 (2014). Briefly, following CO<sub>2</sub> induced anesthesia, the legs of the nymphs were removed  
178 and a silver hook electrode was positioned around the ventral neck connectives for  
179 extracellular recording of DCMD activity. The locusts were positioned above a plastic  
180 platform in the same position and posture as on the airflow-trackball. The experiments were  
181 performed using RDKs with graded speeds and coherence levels similar to the behavioral  
182 experiments, and also using graded sizes of 0.4 ,0.8, 1.2, 1.4, 2.2, 5.5 and 6.8 cm diameter.  
183 Each stimulus was presented for 20 seconds, with an inter-trial period of 1 min. The DCMD  
184 action potential times, number, and frequency were analyzed.

185

186 **Results:**



187 ***The locusts respond to swarming-related visual stimuli with a preference to maintain***  
188 ***their heading***

189 Locusts tethered in our setup exhibited the typical pause-and-go motion pattern even in the  
190 absence of moving visual stimuli (see also (10,34)). Similar walking kinematics  
191 (manifested in pause duration and walking fraction) were measured in response to the white  
192 background only and to the background with motionless dots (Fig. S1). When testing the  
193 effect of moving stimuli, the response of the locusts comprised several clear time-  
194 dependent features (Fig. S2). Specifically, when the direction of the stimulus motion on  
195 one or both screens was opposite to the tethered locust's head direction, the demonstrated  
196 behavioral response was not consistent throughout the stimuli, but became exhausted prior  
197 to termination of the stimuli. This time-limited response was probably due to the open-loop  
198 nature of our experiments, i.e., to the fact that the locust's response did not induce any  
199 (expected) directional change in the incoming visual inputs. Consequently, we limited our  
200 comparative analysis of the different visual-stimuli-induced behavioral responses to the  
201 first 40 seconds of each trial only. During this consistent and robust “responsive time-  
202 interval”, the locusts attempted to align themselves with the direction of motion of the dots,  
203 and/or to join the motion (figure 2).

204 When characterizing the behavioral response to stimuli moving on both screens in the  
205 locust's heading, compared to both screens showing stimuli moving in the opposite  
206 direction, the latter generated a significantly decreased average pause duration (figure 2b,  
207  $n=26$ , Friedman test,  $p<0.05$ , Dunn's multiple comparisons test,  $p<0.05$ ) and significantly  
208 increased overall side motion (figure 2c,  $n=26$ , Friedman test,  $p<0.001$ , Dunn's multiple  
209 comparisons test,  $p<0.01$ ). When each screen displayed a different direction of motion, one

210 aligned with the locust's head direction and the other opposite to it, no significant difference  
211 was observed in the above-noted parameters between this condition and the two others.  
212 However, the locust's side motion towards the monitor displaying moving dots in a  
213 direction aligned with its heading was significantly higher compared to its side motion  
214 towards the other monitor (figure 2c, n=26, Wilcoxon matched-pairs signed rank test,  
215  $p<0.05$ ). No such preference for motion towards a specific side was noted when both  
216 screens displayed stimuli with the same direction of motion. Overall, these findings  
217 confirm the swarming-related nature of our controlled stimuli, i.e., the locusts clearly  
218 attempted to swarm alongside or to join the controlled visual stimuli presented in our  
219 experimental setup, demonstrating a preference towards stimuli that were aligned with their  
220 initial heading.

221

222

223

224 ***Clear thresholds are demonstrated in the response to swarming-related visual stimuli at***  
225 ***both the individual conspecific and the group level.***

226 The next feature investigated for a possible effect on the locust's behavior was motion  
227 speed. As can be seen in figure 3a, a clear dependence and a clear speed threshold were  
228 demonstrated: in response to stimuli with motion speed greater than 3 cm/sec, significantly  
229 higher walking fractions (figure 3a(i), n=15, Kruskal-Wallis test,  $p<0.0001$ ) and shorter  
230 pause durations figure 3a(ii), n=15, Kruskal-Wallis test,  $p<0.0001$ ) were observed,  
231 compared to the response to dots moving at speeds below this threshold.

232 Maintaining the speed of all the moving dots above the demonstrated threshold, and  
233 changing the coherence level among the presented dots, revealed a second decision rule  
234 based on yet another threshold (figure 3b): in response to stimuli with coherence level  
235 above 25%, the locusts exhibited significantly larger walking fractions (figure 3b(i), n=16,  
236 Kruskal-Wallis test,  $p < 0.0001$ ) and significantly shorter pause durations (figure 3b(ii),  
237 n=16, Kruskal-Wallis test,  $p < 0.0001$ ) compared to their response to stimuli with coherence  
238 levels below this threshold. It is important to note that while both the speed and the  
239 coherence level are characteristic features of the visual inputs in a marching swarm, the  
240 former is a feature of each individual group member, contributing to the collective motion  
241 of the swarm; while the latter is a characteristic of the collective, or a group-level trait,  
242 reflecting the common direction of motion.

243

#### 244 *The locust response to complex moving visual stimuli*

245 As noted, the visual environment within a locust swarm is an intricate and noisy one,  
246 intriguing us to investigate locust response to complex and conflicting stimuli (figure 4).  
247 First, locusts were presented with visual stimuli comprising two groups: the 2/3 group of  
248 dots moved in one direction and the 1/3 group of dots moved in the opposite direction All  
249 dots moved at similar speeds, above the speed threshold demonstrated previously. Next,  
250 a size difference was introduced, such as the dots in the minority group being twice the  
251 size of those in the majority group. When 2/3 of the dots were moving in a direction  
252 aligned with the locust's heading and the smaller group of dots were moving in the  
253 opposite direction, no significant effect was observed in the locust's response following  
254 an increase in size of the dots in the smaller group. However, when the majority of dots

255 were moving in the opposite direction to that of the locust's heading, changes in locust  
256 kinematics were noted. When all the dots were equal in size, the locust's walking fraction  
257 significantly decreased (figure 4a, n=19, Friedman test,  $p<0.05$ , Dunn's multiple  
258 comparisons test,  $p<0.05$ ). This was possibly due to the conflict between relative  
259 abundance (2/3 of dots moving in the opposite direction) and the preferred motion  
260 direction still present in the remaining 1/3. Doubling the size of the dots in the 1/3 group,  
261 moving in the direction of the locust's heading partially restored walking fraction and  
262 significantly increased pause duration (figure 4b, n=19, Friedman test,  $p<0.01$ , Dunn's  
263 multiple comparisons test,  $p<0.05$ ). This specific complex visual stimulus required more  
264 intensive information processing by the locust, demonstrated by the larger pauses.  
265 Overall, these findings reveal intricate interactions between stimulus number, size, and  
266 direction, which together affect the locust decision-making process.

### 267 *Neurophysiological correlates to the responses to swarming-related visual cues*

268 Further exploration of the sensory-motor processing of swarming-related visual cues was  
269 conducted through a series of neurophysiological experiments.

270 Based on the behavioral observations, we expected our different visual stimuli to induce  
271 variable neuronal responses, depending on the stimuli motion speed, coherence level, and  
272 dot size. This hypothesis was tested by studying the response of the DCMD interneuron,  
273 a key participant in a well-described motion sensitive visual pathway [42,43], to similar  
274 types of stimuli as above. The DCMD has been mostly studied in the context of looming  
275 stimuli. Hence, it should be noted that the responses observed and monitored in our  
276 experiments differ from those of the typical looming response (figure 5). The DCMD firing

277 rate in response to control stimuli (white background and still dots) was similar to its  
278 spontaneous firing rate reported in previous studies [13]. Manipulating the characteristics  
279 of swarming-related visual stimuli thus induced different responses:

280 *Motion speed* - We found a clear dependence of the DCMD firing rate on the speed of the  
281 moving dots. A significant difference was seen between the slowest tested motion speed –  
282 1 cm/s, and the fastest one – 15 cm/s (figure 6a , n=7, Friedman test,  $p<0.001$ , Dunn's  
283 multiple comparisons test,  $p<0.001$ ), comprising two extremes within the speed range of  
284 marching locusts [12]. The DCMD's responses to visual stimuli moving at intermediate  
285 speeds did not significantly differ from each other.

286 *Coherence level* - Low coherence levels elicited high DCMD firing rates, with the DCMD  
287 response declining with the increase in motion coherence level from 0/1 to 1 (figure 6b).  
288 DCMD firing rate with coherence levels of 0% or 10% was significantly higher compared  
289 to that in response to 100% coherent stimuli (figure 6b, n=6, Friedman test,  $p<0.01$ , Dunn's  
290 multiple comparisons test,  $p<0.01$ ).

291 *Size effect* - Testing the DCMD response to swarming-related moving stimuli comprising  
292 dots of different sizes, revealed a size-dependent firing rate: a significant difference was  
293 noted between dots with a diameter of 0.4 cm and those with a diameter of 2.2, 5.5 or 6.8  
294 cm (figure 6c, n=10, Kruskal-Wallis test,  $p<0.0001$ , Dunn's multiple comparisons test,  
295  $p<0.051$ ). A graded increase in firing rate was seen with the increase in size.

296 Overall, our neurophysiologic investigation revealed that the DCMD was sensitive to  
297 different speeds, coherence levels, and sizes of swarming-related visual stimuli, in a similar  
298 though not identical manner to that revealed in our behavioral experiments.

299 **Discussion**

300 Sensory information has a crucial role in ecological decision-making [15]. In order to  
301 enable sensory processing to be swift and context-appropriate, organisms are required to  
302 identify and extract highly specific, behaviorally relevant, signals from their surroundings  
303 [44]. Different strategies for rapidly coping with a visually cluttered environment have  
304 been suggested in previous studies of different organisms engaged in vision-based  
305 collective motion [13,45–47]. Flocking birds were reported to consider visual information  
306 from a fixed number of influential neighbours (i.e., a topological range; [48]). Zebrafish  
307 rely on visual occupancy for direction choice [45], and use bout-like movements for  
308 conspecific recognition [49]. Collectively moving *Drosophila* larvae depend on the number  
309 of conspecifics and cues related to their unique visual kinematic for decision-making [50].  
310 Beyond the principal role of motion sensitivity in maintaining synchrony during collective  
311 marching [11,12], only very limited knowledge is available regarding how locusts utilize  
312 visual-sensory cues for swarming-related decision-making amidst their highly challenging  
313 visual surroundings.

314 Our findings have identified specific characteristics of the behaviorally-relevant visual  
315 inputs affecting decision-making in desert locust nymphs. Moreover, we show, to the best  
316 of our knowledge for the first time, that locusts can extract collective-motion relevant  
317 information at both the individual conspecific level (i.e. speed) and the group level  
318 (coherence or common direction), possibly by means of filtering and discrimination. While  
319 filtering can reduce the information processing load at the very first stage by differentiating  
320 relevant from non-relevant stimuli and ignoring the latter, discrimination can aid the

321 extraction of information from the relevant stimuli and subsequently facilitate critical  
322 decision-making.

323 Desert locust nymphs walk at an average speed of  $\sim 5$  cm/sec [12]. In response to coherent  
324 stimuli moving at non-zero speeds below 3 cm/sec, the tethered individuals exhibited  
325 longer pause durations and shorter walking fractions, possibly reflecting longer decision-  
326 making time due to a mismatch between dot speed and the expected behaviorally relevant  
327 conspecifics' speed. Hence, the locusts employed filtering at the level of the characteristic  
328 of the individual. In natural settings, such a clear speed threshold may be exploited to  
329 recognize marching conspecifics, such that anything moving at a speed below the threshold  
330 is ignored. This behavioral threshold was discovered in the  $V^{\text{th}}$ -larval instar nymphs  
331 (corresponding to walking speed at this stage). Since locust collective marching appears  
332 early on and is maintained throughout the different developmental (larval) stages [51], and  
333 as development is accompanied by a marked change in size as well as in walking speed, an  
334 interesting point for future research would be that of developmental plasticity within the  
335 observed speed threshold.

336 The relatively limited walking behavior demonstrated in response to dots moving in a non-  
337 coherent fashion (a non-decisive state manifested by unusually long pause durations), could  
338 have resulted from a lack of appropriate relevant information at the level of the group  
339 movement pattern. Importantly, our findings indicate that the locusts perceive a complete  
340 absence of motion cues (i.e., still dots) differently to that of an absence of conclusive  
341 information in the motion cues (i.e., non-coherently moving dots). This could be reflected  
342 in gregarious locusts continuing to walk even when alone (albeit with altered kinematics  
343 [14], but tending to pause and wait when surrounded by conspecifics moving randomly,

344 e.g., early morning at the initial organizing stages of a swarm in a natural setting[51,52].  
345 This ability to extract the trajectory of the surrounding locusts seems to be a fundamental  
346 characteristic of gregarious-phase locusts, instrumental for the decision-making in enabling  
347 the collective motion of locust swarms.

348 In his review, Warrant [53] discusses different visual matched filters and their important  
349 role in the ecology of vision in insects. These include peripheral matched filters for sex  
350 (mate), for prey detection and pursuit, and for the physical environment (aspects of the  
351 physical terrain). Central visual matched filters include filters for the insect's own  
352 locomotion speed ("fast" or "slow" eyes) and for navigation (the celestial pattern of  
353 polarized light). Our above findings suggest yet another possible matched filter that is  
354 crucial for locust swarming behavior: this can be referred to as a "social environment"  
355 matched filter, or maybe even filters, as we have demonstrated filtering at both the level of  
356 the motion of individual neighboring conspecifics as well as of the surrounding group.

357 Relevant conflicting stimuli increase the difficulty imposed on information processing and  
358 decision-making. A conflict can derive from a contradiction in one feature (e.g. opposing  
359 motion directions), requiring a single-attribute decision, or from the complex interactions  
360 between several features (e.g. direction, abundance, and size), becoming a multi-attribute  
361 choice problem [54]. Locusts presented with directionally contradicting but otherwise  
362 identical swarming-related visual stimuli, demonstrated a preference for stimuli with  
363 motion direction aligned with their own heading. This preference to join in the marching  
364 aligned to the locust's current heading is consistent with the observation that marching  
365 locusts in experimental ring-shaped arenas only rarely change direction [11,13]. When  
366 different parameters provide conflicting or inconsistent information, it becomes beneficial



367 to assign a higher weight to one over the other. Ants, for example, rank several attributes  
368 when faced with a multi-feature problem [55], and the ranking is dynamic in relation to  
369 their current situation [56]. When presented with mixed-type stimuli, size affected the  
370 locust's behavior only when in a specific relation to the direction of motion and relative  
371 abundance. The interplay between these three parameters significantly affected pause  
372 duration, which is the kinematic phase assumed to be dedicated to information processing  
373 and decision-making [13,34]. Size may act as a proxy for visual target distance, with  
374 nearest neighbors being larger. More attention dedicated to larger dots, although less  
375 abundant, indicates that immediate neighbors may influence the decision of an individual  
376 more strongly than more distant members of the swarm. This is also consistent with  
377 previous reports suggesting a limited functional radius of attention around an individual in  
378 a group [13];[14].

379 The DCMD is only one out of several currently known descending interneurons that take  
380 part in motion-sensitive pathways [57,58]. It has been widely researched for its  
381 characteristic response to looming visual stimuli, and its function in predator and  
382 collision avoidance maneuvers [59–62]. Nevertheless, the motion-sensitive pathway in  
383 which it takes part is capable of responding to different, complex types of visual-motion  
384 stimuli [37,62]. The DCMD was also shown to demonstrate activity changes with  
385 developmental stages [36]. Ariel et al. [13] demonstrated the its ability to convey  
386 information regarding motion types similar to those of marching locusts, and a specific  
387 "tuning" of the response habituation rate in swarming, gregarious-phase locusts compared  
388 to the non-swarming solitarious-phase ones. Hence, the DCMD response to swarming-  
389 related visual stimuli, to which locusts demonstrated behavioral responses, can provide

390 information regarding the neurophysiological mechanisms underlying these behavioral  
391 responses, and the related decision-making process. The DCMD in our experimental  
392 setting demonstrated consistent responses to non-looming visual stimuli, with a clear  
393 effect of changes in motion speed, coherence level, and stimulus size. The sensitivity to  
394 changes in these specific visual stimulus features emphasizes their importance and  
395 supports the involvement of these during visual information processing in swarming-  
396 related decision-making.

397 In its simplest form, decision-making can be understood as the process of selecting between  
398 two alternatives. The flexibility of decisions is accepted as a trademark of higher cognition  
399 in organisms [63]. Given that cognitive performances and integral abilities are often  
400 assumed to be positively correlated with brain size across species, it is no surprise that the  
401 miniature brains of insects are believed to limit their computational power and cognitive  
402 abilities [64–67]. However, with mounting evidence in support of highly sophisticated  
403 behaviors in insects [68], this assumption currently holds little ground. Here, we have  
404 provided additional insights into insect cognition by investigating decision-making in a  
405 collectively marching insect species. We demonstrate that desert locusts use  
406 discrimination, mediated by selective attention, to extract relevant information from a  
407 complex, noisy, visual environment. The rules of decision-making (decision rules) in  
408 gregarious desert locusts seem to be a function of multiple interacting factors, with the  
409 ultimate goal of staying in sync with conspecifics. A differential weightage to parameters  
410 such as direction, number, and size of the stimuli was also observed, with conflicting  
411 information increasing the difficulty imposed on the decision-making process.

412 To conclude, locusts utilize different mechanisms that enable them to meet the challenges  
413 presented by the overloaded and cluttered visual environment, and that support the sensory  
414 perception and integration required for collective motion-related decision-making. These  
415 mechanisms constitute an instrumental aspect of their ability to synchronize with  
416 conspecifics and maintain the cohesion of the swarm, and thus probably also exist in all  
417 animals demonstrating visual-based collective motion. Much further work is required,  
418 however, in order to uncover and describe the details of the sensory-motor integration (e.g.  
419 the role of feedback from the motor system), to fully elucidate the underlying  
420 neurophysiological mechanisms (e.g. additional key neuronal pathways), and to provide  
421 insights into related brain-level phenomena, such as the representation of conspecifics and  
422 their behavior (speed, direction, etc.), the actual depiction or abstraction of the swarm as a  
423 whole, and more.

424

#### 425 **FUNDING**

426 This research was funded by The Israel Science Foundation (ISF), research grant  
427 2306/18.

428

#### 429 **AUTHOR CONTRIBUTION**

430 AA conceived the study; IB and PY carried out experiments and data analysis. AA and  
431 IB and PY wrote the manuscript

432 The authors have no competing interests related to this study.

433

434 Supplementary material is available online on DRYAD:

435 <https://doi.org/10.5061/dryad.jdfn2z3dw>

436

437

438

439

#### 440 **Bibliography**

- 441 1. Gueron S, Levin SA, Rubenstein DI. 1996 The Dynamics of Herds: From  
442 Individuals to Aggregations. *J. Theor. Biol.* **182**, 85–98.  
443 (doi:10.1006/jtbi.1996.0144)

- 444 2. Petit O, Bon R. 2010 Decision-making processes: the case of collective  
445 movements. *Behav. Processes* **84**, 635–647. (doi:10.1016/j.beproc.2010.04.009)
- 446 3. Herbert-Read JE. 2016 Understanding how animal groups achieve coordinated  
447 movement. *J. Exp. Biol.* **219**, 2971–2983. (doi:10.1242/jeb.129411)
- 448 4. Heras FJH, Romero-Ferrero F, Hinz RC, de Polavieja GG. 2019 Deep attention  
449 networks reveal the rules of collective motion in zebrafish. *PLoS Comput. Biol.*  
450 **15**, e1007354. (doi:10.1371/journal.pcbi.1007354)
- 451 5. Gil MA, Hein AM, Spiegel O, Baskett ML, Sih A. 2018 Social information links  
452 individual behavior to population and community dynamics. *Trends Ecol. Evol.*  
453 **33**, 535–548. (doi:10.1016/j.tree.2018.04.010)
- 454 6. Yang W-C, Schmickl T. 2019 Collective motion as an ultimate effect in crowded  
455 selfish herds. *Sci. Rep.* **9**, 6618. (doi:10.1038/s41598-019-43179-6)
- 456 7. Be'er A, Ariel G. 2019 A statistical physics view of swarming bacteria. *Mov.*  
457 *Ecol.* **7**, 9. (doi:10.1186/s40462-019-0153-9)
- 458 8. Ayali A. 2019 The puzzle of locust density-dependent phase polyphenism. *Curr.*  
459 *Opin. Insect Sci.* **35**, 41–47. (doi:10.1016/j.cois.2019.06.008)
- 460 9. Cullen DA *et al.* 2017 From molecules to management: mechanisms and  
461 consequences of locust phase polyphenism. In *Insect Epigenetics*, pp. 167–285.  
462 Elsevier. (doi:10.1016/bs.aipp.2017.06.002)
- 463 10. Ariel G, Ayali A. 2015 Locust collective motion and its modeling. *PLoS Comput.*  
464 *Biol.* **11**, e1004522. (doi:10.1371/journal.pcbi.1004522)
- 465 11. Buhl J, Sumpter DJT, Couzin ID, Hale JJ, Despland E, Miller ER, Simpson SJ.  
466 2006 From disorder to order in marching locusts. *Science* **312**, 1402–1406.  
467 (doi:10.1126/science.1125142)
- 468 12. Knebel D, Ayali A, Guershon M, Ariel G. 2019 Intra- versus intergroup variance  
469 in collective behavior. *Sci. Adv.* **5**, eaav0695. (doi:10.1126/sciadv.aav0695)
- 470 13. Ariel G, Ophir Y, Levi S, Ben-Jacob E, Ayali A. 2014 Individual pause-and-go  
471 motion is instrumental to the formation and maintenance of swarms of marching  
472 locust nymphs. *PLoS ONE* **9**, e101636. (doi:10.1371/journal.pone.0101636)
- 473 14. Knebel D, Sha-Ked C, Agmon N, Ariel G, Ayali A. 2021 Collective motion as a  
474 distinct behavioral state of the individual. *iScience* **24**, 102299.  
475 (doi:10.1016/j.isci.2021.102299)
- 476 15. Hein AM. 2022 Ecological decision-making: From circuit elements to emerging

- 477 principles. *Curr. Opin. Neurobiol.* **74**, 102551. (doi:10.1016/j.conb.2022.102551)
- 478 16. Bernays EA, Wcislo WT. 1994 Sensory Capabilities, Information Processing, and  
479 Resource Specialization. *Q. Rev. Biol.* **69**, 187. (doi:10.1086/418539)
- 480 17. Kohn JR, Heath SL, Behnia R. 2018 Eyes matched to the prize: the state of  
481 matched filters in insect visual circuits. *Front. Neural Circuits* **12**, 26.  
482 (doi:10.3389/fncir.2018.00026)
- 483 18. Benard J, Stach S, Giurfa M. 2006 Categorization of visual stimuli in the  
484 honeybee *Apis mellifera*. *Anim. Cogn.* **9**, 257–270. (doi:10.1007/s10071-006-  
485 0032-9)
- 486 19. Stach S, Benard J, Giurfa M. 2004 Local-feature assembling in visual pattern  
487 recognition and generalization in honeybees. *Nature* **429**, 758–761.  
488 (doi:10.1038/nature02594)
- 489 20. Wehner R. 1987 ?Matched filters? ? neural models of the external world. *J. Comp.*  
490 *Physiol.* **161**, 511–531. (doi:10.1007/BF00603659)
- 491 21. Nordström K. 2012 Neural specializations for small target detection in insects.  
492 *Curr. Opin. Neurobiol.* **22**, 272–278. (doi:10.1016/j.conb.2011.12.013)
- 493 22. O’Carroll D. 1993 Feature-detecting neurons in dragonflies. *Nature* **362**, 541–  
494 543. (doi:10.1038/362541a0)
- 495 23. Warrant EJ. 2016 Sensory matched filters. *Curr. Biol.* **26**, R976–R980.  
496 (doi:10.1016/j.cub.2016.05.042)
- 497 24. Wang M-Y, Ings TC, Proulx MJ, Chittka L. 2013 Can bees simultaneously  
498 engage in adaptive foraging behaviour and attend to cryptic predators? *Animal*  
499 *Behaviour* **86**, 859–866. (doi:10.1016/j.anbehav.2013.07.029)
- 500 25. van Swinderen B. 2012 Competing visual flicker reveals attention-like rivalry in  
501 the fly brain. *Front. Integr. Neurosci.* **6**, 96. (doi:10.3389/fnint.2012.00096)
- 502 26. Römer H, Krusch M. 2000 A gain-control mechanism for processing of chorus  
503 sounds in the afferent auditory pathway of the bushcricket *Tettigonia viridissima*  
504 (Orthoptera; Tettigoniidae). *J. Comp. Physiol. A* **186**, 181–191.  
505 (doi:10.1007/s003590050018)
- 506 27. Nityananda V. 2016 Attention-like processes in insects. *Proc. Biol. Sci.* **283**.  
507 (doi:10.1098/rspb.2016.1986)
- 508 28. Giurfa M. 2004 Conditioning procedure and color discrimination in the honeybee  
509 *Apis mellifera*. *Naturwissenschaften* **91**, 228–231. (doi:10.1007/s00114-004-

- 510 0530-z)
- 511 29. Dyer AG, Chittka L. 2004 Fine colour discrimination requires differential  
512 conditioning in bumblebees. *Naturwissenschaften* **91**, 224–227.  
513 (doi:10.1007/s00114-004-0508-x)
- 514 30. 1995 Shape vision in bees: innate preference for flower-like patterns. *Phil. Trans.  
515 R. Soc. Lond. B* **347**, 123–137. (doi:10.1098/rstb.1995.0017)
- 516 31. 1994 Visual discrimination of pattern orientation by honeybees: performance and  
517 implications for “cortical” processing. *Phil. Trans. R. Soc. Lond. B* **343**, 199–210.  
518 (doi:10.1098/rstb.1994.0021)
- 519 32. Tang S, Juusola M. 2010 Intrinsic Activity in the Fly Brain Gates Visual  
520 Information during Behavioral Choices. *Nature Precedings*  
521 (doi:10.1038/npre.2010.4325.1)
- 522 33. Giurfa M. 2013 Cognition with few neurons: higher-order learning in insects.  
523 *Trends Neurosci.* **36**, 285–294. (doi:10.1016/j.tins.2012.12.011)
- 524 34. Bazazi S, Bartumeus F, Hale JJ, Couzin ID. 2012 Intermittent motion in desert  
525 locusts: behavioural complexity in simple environments. *PLoS Comput. Biol.* **8**,  
526 e1002498. (doi:10.1371/journal.pcbi.1002498)
- 527 35. Kien J, Altman JS. 1984 Descending interneurons from the brain and  
528 suboesophageal ganglia and their role in the control of locust behaviour. *J. Insect  
529 Physiol.* **30**, 59–72. (doi:10.1016/0022-1910(84)90108-2)
- 530 36. Simmons PJ, Sztarker J, Rind FC. 2013 Looming detection by identified visual  
531 interneurons during larval development of the locust *Locusta migratoria*. *J. Exp.  
532 Biol.* **216**, 2266–2275. (doi:10.1242/jeb.083360)
- 533 37. Dick PC, Gray JR. 2014 Spatiotemporal stimulus properties modulate responses  
534 to trajectory changes in a locust looming-sensitive pathway. *J. Neurophysiol.* **111**,  
535 1736–1745. (doi:10.1152/jn.00499.2013)
- 536 38. Matheson T, Rogers SM, Krapp HG. 2004 Plasticity in the visual system is  
537 correlated with a change in lifestyle of solitary and gregarious locusts. *J.  
538 Neurophysiol.* **91**, 1–12. (doi:10.1152/jn.00795.2003)
- 539 39. Moore RJD, Taylor GJ, Paulk AC, Pearson T, van Swinderen B, Srinivasan MV.  
540 2014 FicTrac: a visual method for tracking spherical motion and generating fictive  
541 animal paths. *J. Neurosci. Methods* **225**, 106–119.  
542 (doi:10.1016/j.jneumeth.2014.01.010)
- 543 40. Peirce J, Gray JR, Simpson S, MacAskill M, Höchenberger R, Sogo H, Kastman

- 544 E, Lindeløv JK. 2019 PsychoPy2: Experiments in behavior made easy. *Behav.*  
545 *Res. Methods* **51**, 195–203. (doi:10.3758/s13428-018-01193-y)
- 546 41. Gold JI, Shadlen MN. 2007 The neural basis of decision making. *Annu. Rev.*  
547 *Neurosci.* **30**, 535–574. (doi:10.1146/annurev.neuro.29.051605.113038)
- 548 42. Gabbiani F, Krapp HG, Laurent G. 1999 Computation of object approach by a  
549 wide-field, motion-sensitive neuron. *J. Neurosci.* **19**, 1122–1141.  
550 (doi:10.1523/JNEUROSCI.19-03-01122.1999)
- 551 43. Fotowat H, Gabbiani F. 2011 Collision detection as a model for sensory-motor  
552 integration. *Annu. Rev. Neurosci.* **34**, 1–19. (doi:10.1146/annurev-neuro-061010-  
553 113632)
- 554 44. Warren WH. 2021 Information Is Where You Find It: Perception as an  
555 Ecologically Well-Posed Problem. *Iperception* **12**, 20416695211000370.  
556 (doi:10.1177/20416695211000366)
- 557 45. Harpaz R, Nguyen MN, Bahl A, Engert F. 2021 Precise visuomotor  
558 transformations underlying collective behavior in larval zebrafish. *Nat. Commun.*  
559 **12**, 6578. (doi:10.1038/s41467-021-26748-0)
- 560 46. Fernández-Juricic E, Erichsen JT, Kacelnik A. 2004 Visual perception and social  
561 foraging in birds. *Trends Ecol. Evol.* **19**, 25–31. (doi:10.1016/j.tree.2003.10.003)
- 562 47. Dombrowski M, Kim A, Poussard L, Vaccari A, Acton S, Spillman E, Condrón B,  
563 Yuan Q. 2019 A plastic visual pathway regulates cooperative behavior in  
564 drosophila larvae. *Curr. Biol.* **29**, 1866-1876.e5. (doi:10.1016/j.cub.2019.04.060)
- 565 48. Ballerini M *et al.* 2008 Interaction ruling animal collective behavior depends on  
566 topological rather than metric distance: evidence from a field study. *Proc Natl*  
567 *Acad Sci USA* **105**, 1232–1237. (doi:10.1073/pnas.0711437105)
- 568 49. Kappel JM *et al.* 2022 Visual recognition of social signals by a tectothalamic  
569 neural circuit. *Nature* (doi:10.1038/s41586-022-04925-5)
- 570 50. Slepian Z, Sundby K, Glier S, McDaniels J, Nystrom T, Mukherjee S, Acton ST,  
571 Condrón B. 2015 Visual attraction in *Drosophila* larvae develops during a critical  
572 period and is modulated by crowding conditions. *J. Comp. Physiol. A Neuroethol.*  
573 *Sens. Neural Behav. Physiol.* **201**, 1019–1027. (doi:10.1007/s00359-015-1034-3)
- 574 51. Uvarov B. 1977 Grasshoppers and locusts. A handbook of general acridology.  
575 Volume 2. Behaviour, ecology, biogeography, population dynamics. *undefined*
- 576 52. Ellis PE, Ashall C. 1957 Field Studies on diurnal Behaviour, Movement and  
577 Aggregation in the Desert Locust (*Schistocerca gregaria* Forskål). *Field Studies on*

- 578 *diurnal Behaviour, Movement and Aggregation in the Desert Locust (Schistocerca*  
579 *gregaria Forskål).*
- 580 53. Warrant EJ. 2016 Matched filtering and the ecology of vision in insects. In *The*  
581 *ecology of animal senses* (eds G von der Emde, E Warrant), pp. 143–167. Cham:  
582 Springer International Publishing. (doi:10.1007/978-3-319-25492-0\_6)
- 583 54. Latty T, Trueblood JS. 2020 How do insects choose flowers? A review of multi-  
584 attribute flower choice and decoy effects in flower-visiting insects. *J. Anim. Ecol.*  
585 **89**, 2750–2762. (doi:10.1111/1365-2656.13347)
- 586 55. Franks NR, Mallon EB, Bray HE, Hamilton MJ, Mischler TC. 2003 Strategies for  
587 choosing between alternatives with different attributes: exemplified by house-  
588 hunting ants. *Animal Behaviour* **65**, 215–223. (doi:10.1006/anbe.2002.2032)
- 589 56. Sasaki T, Pratt SC. 2013 Ants learn to rely on more informative attributes during  
590 decision-making. *Biol. Lett.* **9**, 20130667. (doi:10.1098/rsbl.2013.0667)
- 591 57. Williamson R, Burns MD. 1982 Large neurones in locust neck connectives. *J.*  
592 *Comp. Physiol.* **147**, 379–388. (doi:10.1007/BF00609672)
- 593 58. Card GM. 2012 Escape behaviors in insects. *Curr. Opin. Neurobiol.* **22**, 180–186.  
594 (doi:10.1016/j.conb.2011.12.009)
- 595 59. Judge S, Rind F. 1997 The locust DCMD, a movement-detecting neurone tightly  
596 tuned to collision trajectories. *J. Exp. Biol.* **200**, 2209–2216.  
597 (doi:10.1242/jeb.200.16.2209)
- 598 60. Schlotterer GR. 1977 Response of the locust descending movement detector  
599 neuron to rapidly approaching and withdrawing visual stimuli. *Can. J. Zool.* **55**,  
600 1372–1376. (doi:10.1139/z77-179)
- 601 61. Pinter RB, Olberg RM, Abrams TW. 1982 Is the locust DCMD A looming  
602 detector? *J. Exp. Biol.* **101**, 327–331. (doi:10.1242/jeb.101.1.327)
- 603 62. Rind FC, Simmons PJ. 1992 Orthopteran DCMD neuron: a reevaluation of  
604 responses to moving objects. I. Selective responses to approaching objects. *J.*  
605 *Neurophysiol.* **68**, 1654–1666. (doi:10.1152/jn.1992.68.5.1654)
- 606 63. Haberkern H, Jayaraman V. 2016 Studying small brains to understand the  
607 building blocks of cognition. *Curr. Opin. Neurobiol.* **37**, 59–65.  
608 (doi:10.1016/j.conb.2016.01.007)
- 609 64. Mosqueiro TS, Huerta R. 2014 Computational models to understand decision  
610 making and pattern recognition in the insect brain. *Curr. Opin. Insect Sci.* **6**, 80–  
611 85. (doi:10.1016/j.cois.2014.10.005)



- 612 65. Ratcliffe JM, Fenton MB, Shettleworth SJ. 2006 Behavioral flexibility positively  
613 correlated with relative brain volume in predatory bats. *Brain Behav. Evol.* **67**,  
614 165–176. (doi:10.1159/000090980)
- 615 66. Shultz S, Dunbar RIM. 2010 Species differences in executive function correlate  
616 with hippocampus volume and neocortex ratio across nonhuman primates. *J.*  
617 *Comp. Psychol.* **124**, 252–260. (doi:10.1037/a0018894)
- 618 67. Sol D, Timmermans S, Lefebvre L. 2002 Behavioural flexibility and invasion  
619 success in birds. *Animal Behaviour* **63**, 495–502. (doi:10.1006/anbe.2001.1953)
- 620 68. Chittka L, Giurfa M, Riffell JA. 2019 Editorial: the mechanisms of insect  
621 cognition. *Front. Psychol.* **10**, 2751. (doi:10.3389/fpsyg.2019.02751)

Figure 1. (a) Swarming desert locust nymphs. View from above (a)(i) and from the typical height of a locust (a)(ii). Photos taken in Kenya in 2020 by Inga Petelski. (b) Experimental set-up: complete set-up (b)(i) and individual tethered locust (b)(ii). Individual locust was tethered, with a fixed heading, to an airflow suspended trackball. Random dot kinematograms were presented on two parallel LCD screens. High-speed video camera and a mouse sensor were used for behavioral tracking.

Figure 2. Locust response to swarming-related visual stimuli. Walking fraction (a), average pause duration (b) and side motion (c) in response to different motion directions of the stimuli. Arrowheads represent direction of motion relative to locust heading. Each point represents data from a single locust ( $n = 26$ ). Gray lines denote the median. Boxes show the interquartile range (25th to 75th percentiles). Whiskers include points up to 1.5 times the interquartile range. (a)-no significant difference between different stimuli (b)- Different letters represent statistical differences. (c)- S1- side motion versus one side, S2- side motion versus the other side and T=total side motion (S1+S2). Different capital letters represent statistical differences in total side motion between different types of stimuli; different lower case letters represent statistical differences between different sides (S1 and S2) of the same stimulus.

Figure 3. Behavioral thresholds in response to swarming-related visual stimuli. Average pause duration (a)(i) and walking fraction (a)(ii) in response to different stimulus motion speeds ( $n = 15$ ). average pause (b)(i) and (b)(ii) in response to different stimulus coherence levels ( $n = 16$ ). Each point represents data from a single locust. Gray lines denote the median. Boxes show the interquartile range (25th to 75th percentiles). Whiskers include points up to 1.5 times the interquartile range. Points that are more than 1.5 times the interquartile range away from the bottom or top of the box are outliers. Different letters represent statistical differences. Gray dashed line indicates location of behavioral threshold.

Figure 4. Size-direction-abundance interplay in response to complex visual stimuli. Walking fraction (a) and average pause duration (b). Arrowheads represent direction of motion. Arrow length represents relative abundance (long arrows = 2/3 of dots, short arrows = 1/3 of dots). Arrow width represents dot size (wide arrows – larger dots). Each point represents data from a single locust ( $n = 19$ ). Gray lines denote the median. Boxes show the interquartile range (25th to 75th percentiles). Whiskers include points up to 1.5 times the interquartile range. Different letters represent statistical differences.

Figure 5. Typical response of the DCMD to swarming-related (a) and looming (b) stimuli. DCMD spike occurrence times (blue) were extracted from the extracellular recordings (black). Individual raster trials were then smoothed with a 20 ms Gaussian window and an evaluation of the instantaneous firing rate (red) was calculated. Recording (a) is the responses to swarming-related visual stimuli with motion speed of 5 cm/s and recording (b) is a response to looming stimulus (modified from Ariel et al. 2014).

Figure 6. DCMD response to different motion speeds (a), coherence levels (b) and dot size (c) of swarming-related visual stimuli. Each point represents data from a single locust (a) n=7, (b) n=6, and (c) n=10). Gray lines denote the median. Boxes show the interquartile range (25th to 75th percentiles). Whiskers include points up to 1.5 times the interquartile range. Different letters represent statistical differences. (a) and (b) - Gray dashed line indicates value of behavioral threshold.

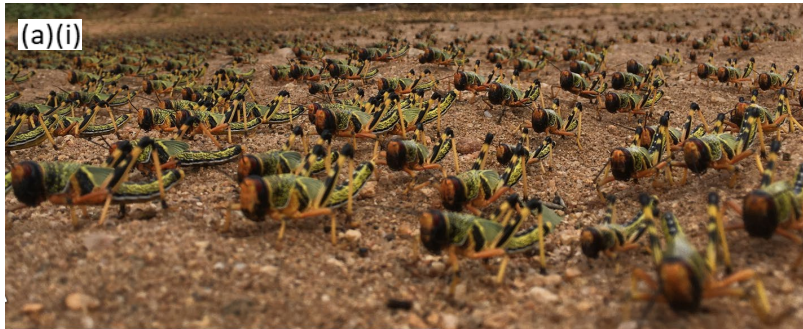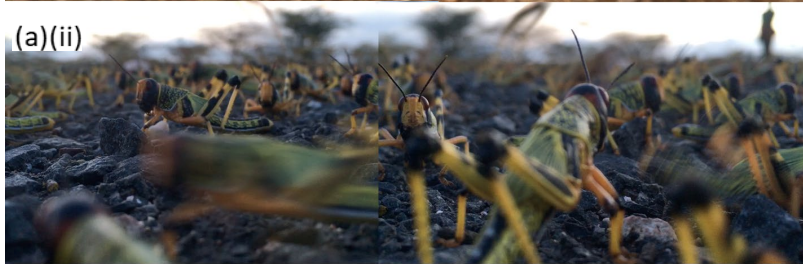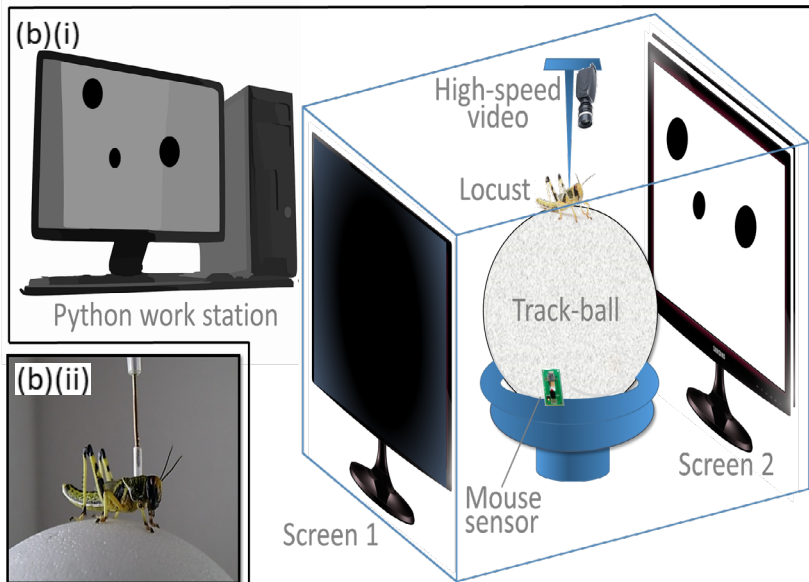

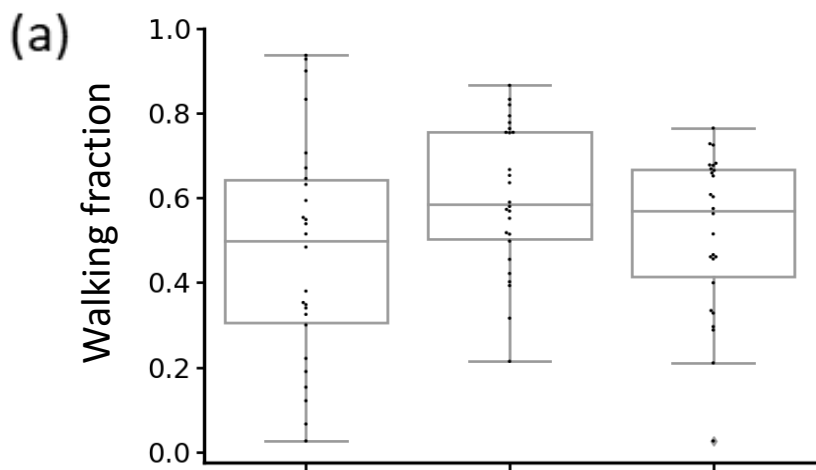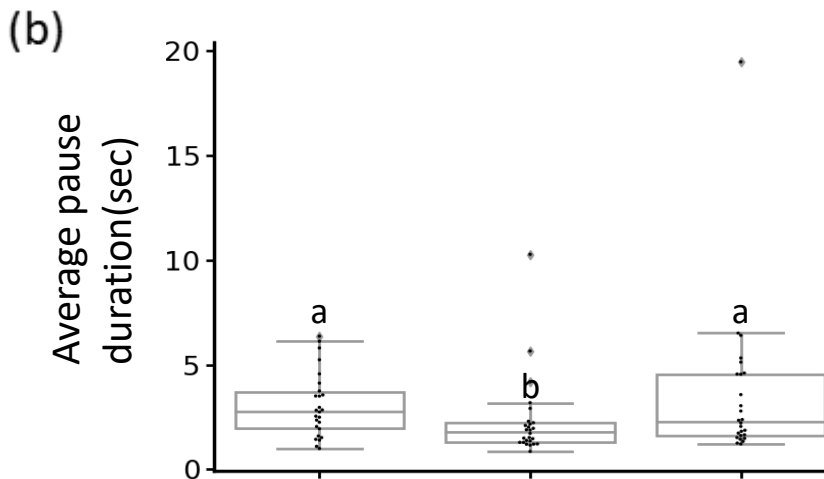

Stimulus direction

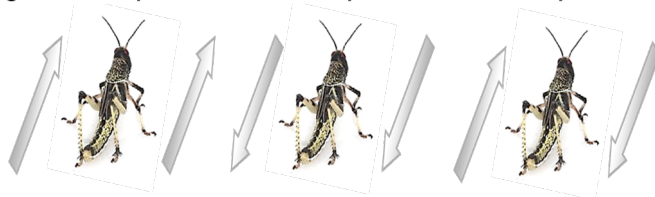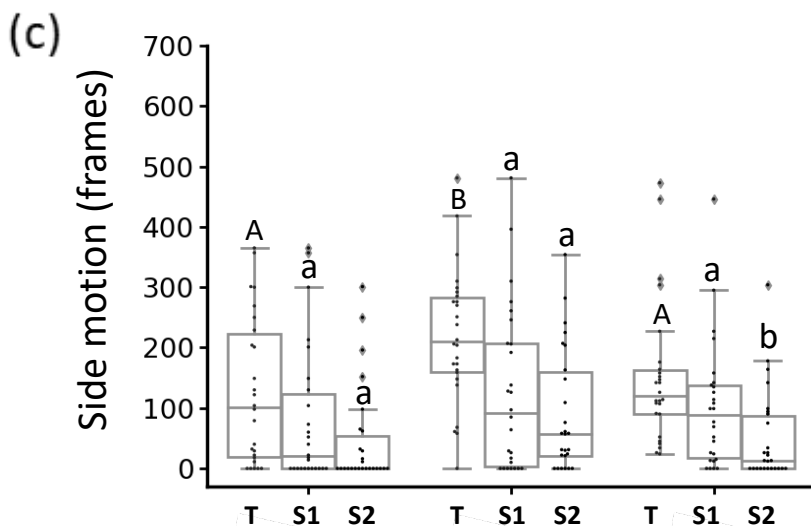

Stimulus direction

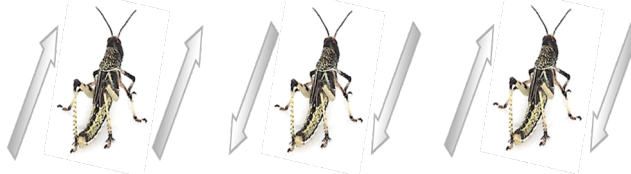

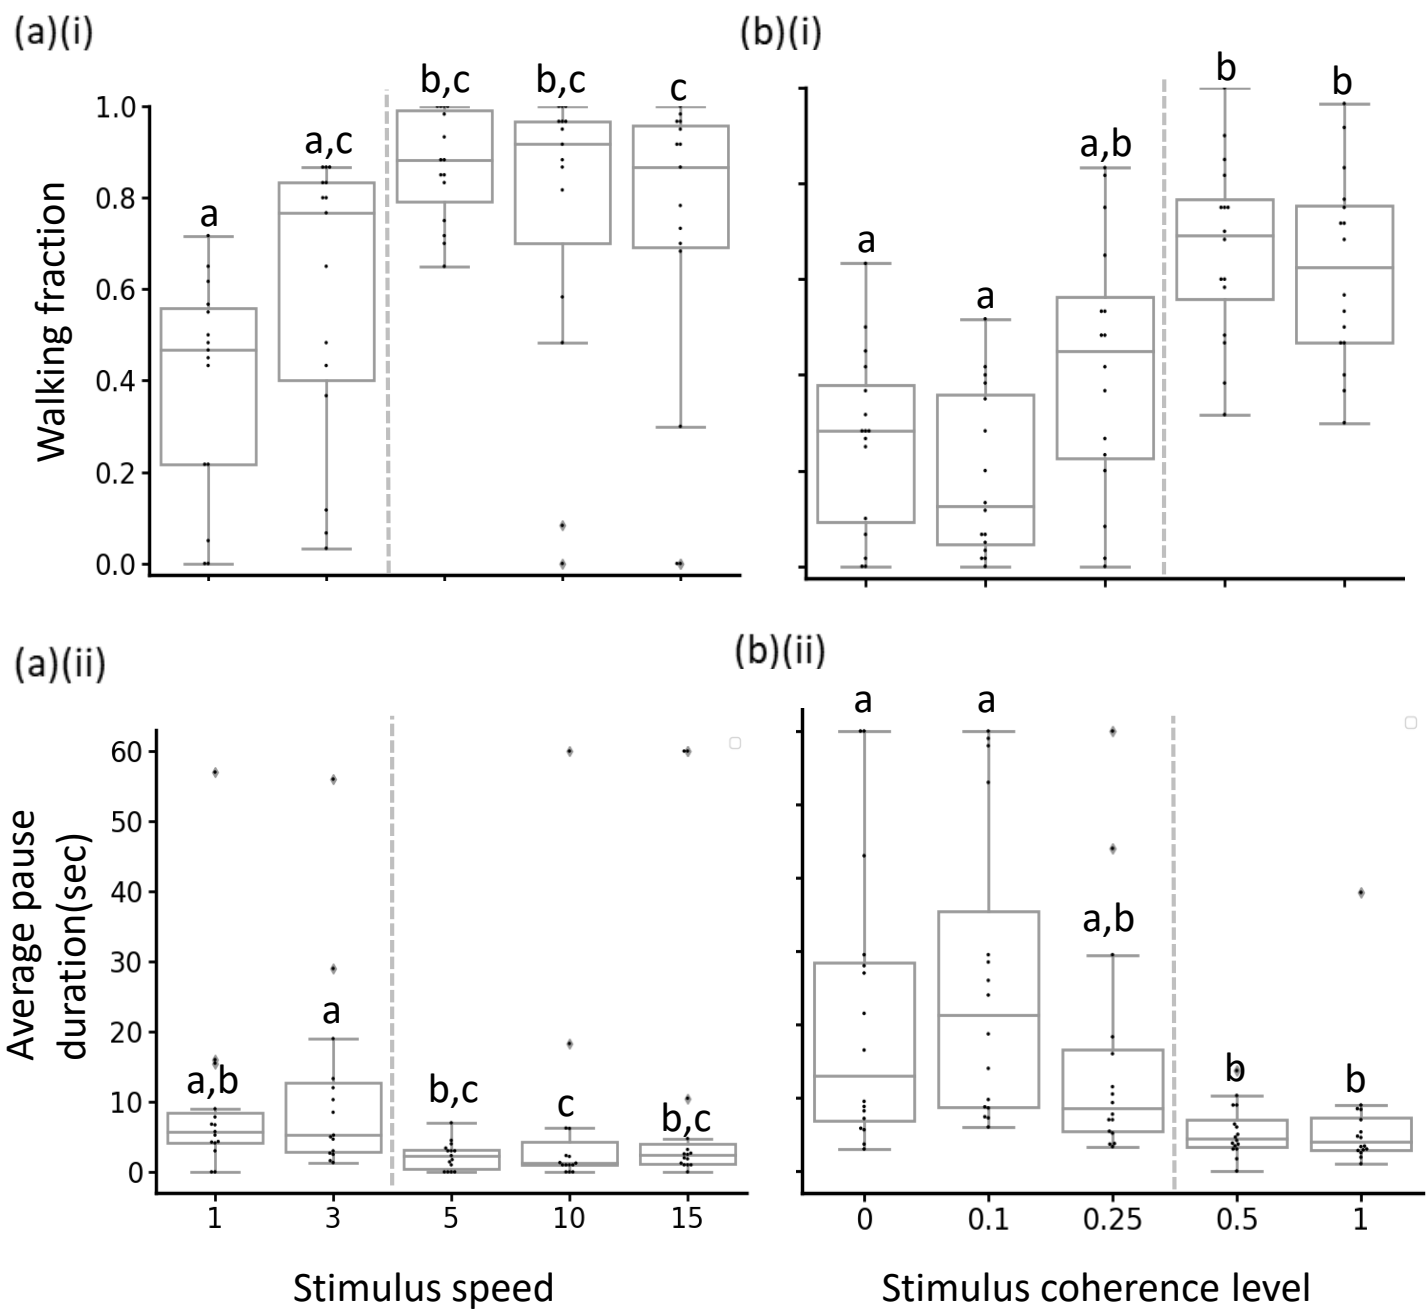

(a)

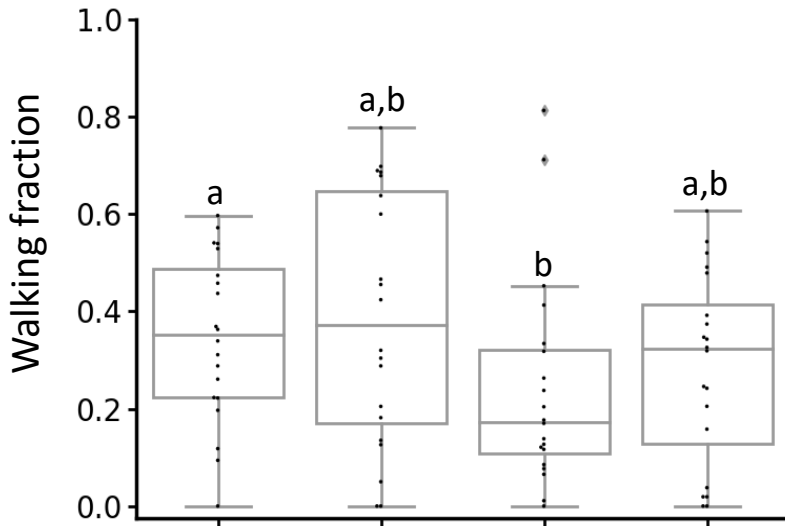

(b)

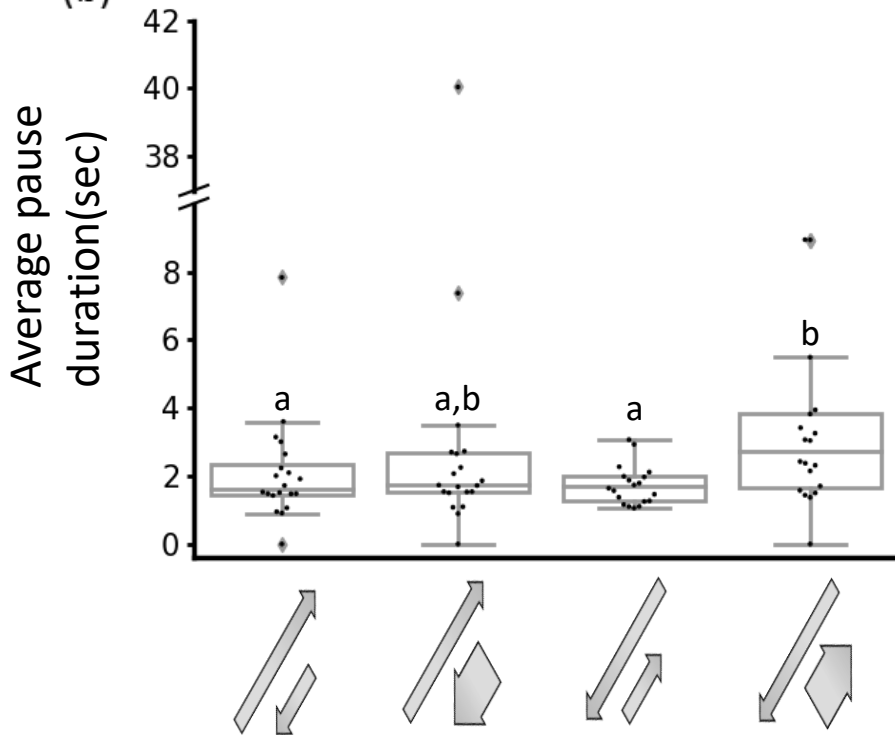

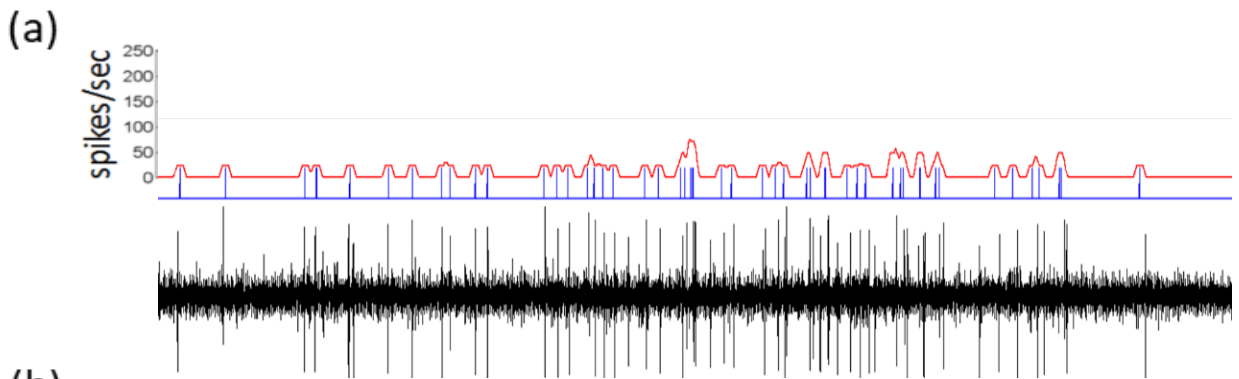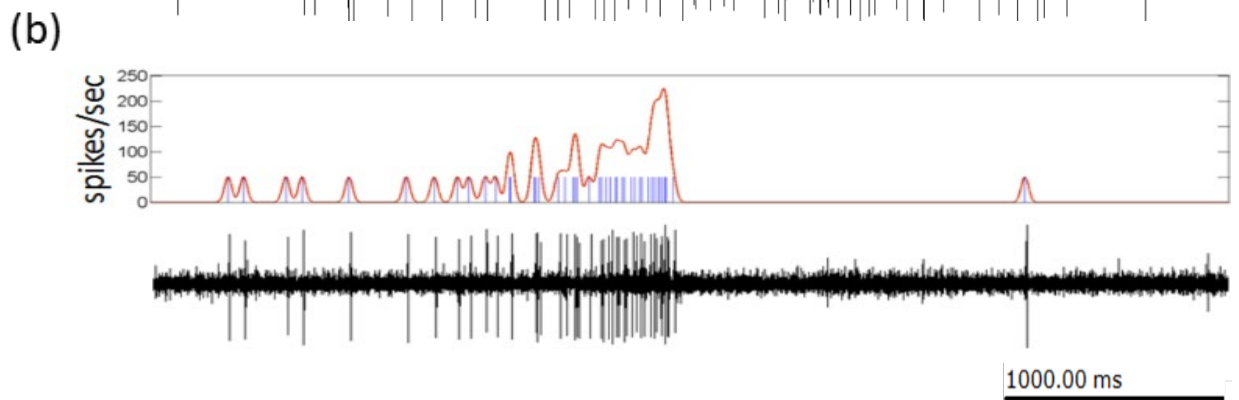



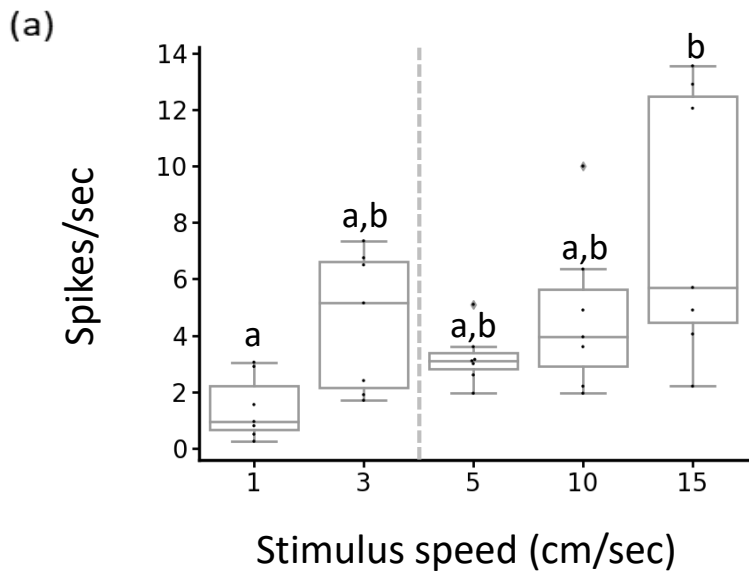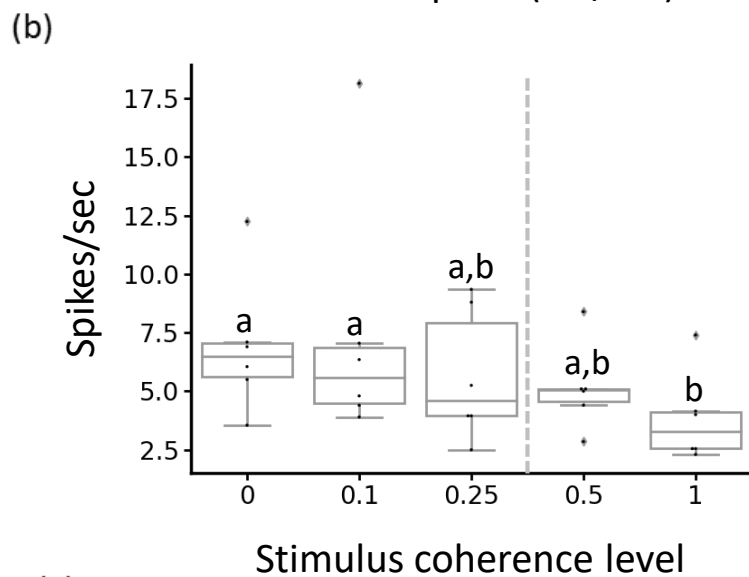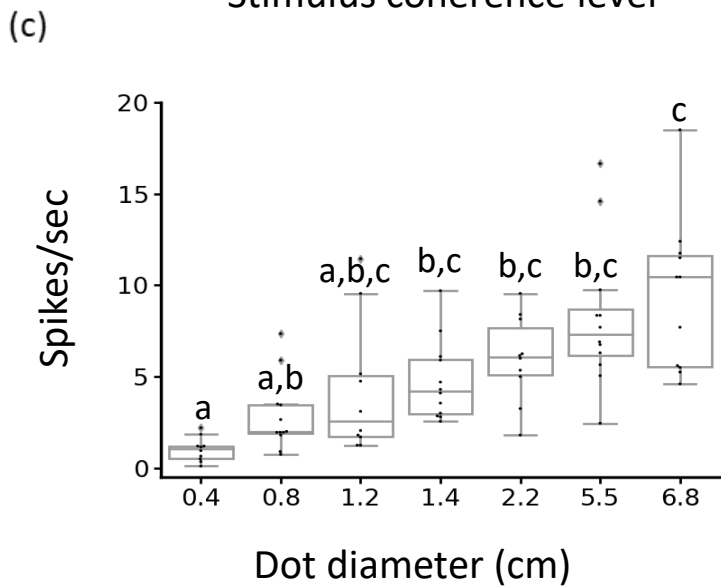

Source: https://www.biorxiv.org/content/10.1101/2022.09.19.508462v2.full.pdf
